# Supplementary material for: Achieving high energy density in a 4.5 V all nitrogen-doped graphene based lithium-ion capacitor
Source: Royal Society of Chemistry journal article supplement (doi:10.1039/c9ta06316a), 2019-01-01
Supplement: c9ta06316a1.pdf [file c9ta06316a1.pdf]

## Supplementary Information for

### ***Achieving High Energy Density in a 4.5 V All Nitrogen-Doped Graphene Based Lithium-Ion Capacitors***

*Ronghua Wang<sup>c,\*</sup>, Qiannan Zhao<sup>a</sup>, Weikang Zheng<sup>c</sup>, Zongling Ren<sup>a</sup>, Xiaolin Hu<sup>a</sup>, Jing  
Li<sup>d</sup>, Li Lu<sup>e</sup>, Ning Hu<sup>a</sup>, Janina Molenda<sup>f</sup>, Xingjiang Liu<sup>b,\*</sup>, and Chaohe Xu<sup>a,\*</sup>*

*<sup>a</sup> College of Aerospace Engineering, Chongqing University, Chongqing 400044, China*

*<sup>b</sup> Science and Technology on Power Sources Laboratory, Tianjin Institute of Power  
Sources, Tianjin 300384, China*

*<sup>c</sup> College of Materials Science and Engineering, Chongqing University, Chongqing  
400044, China*

*<sup>d</sup> College of Chemical Engineering, Chongqing University, Chongqing 400044, China*

*<sup>e</sup> Department of Mechanical Engineering, National University of Singapore, Singapore  
117581, Singapore*

*<sup>f</sup> AGH University of Science and Technology, Faculty of Energy and Fuels, al.  
Mickiewicza 30, 30-059 Kraków, Poland*

#### **AUTHOR INFORMATION**

##### **Corresponding Author**

**E-mail:** [wangrh@cqu.edu.cn](mailto:wangrh@cqu.edu.cn) (R. Wang); [xche@cqu.edu.cn](mailto:xche@cqu.edu.cn) (C. Xu); [xjliu@nklps.org](mailto:xjliu@nklps.org) (X.  
Liu)

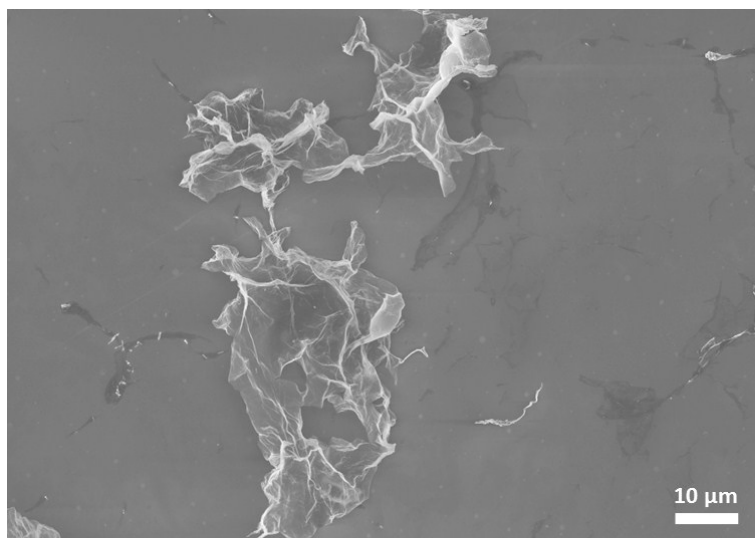

**Figure S1.** SEM image of the GO nanosheets.

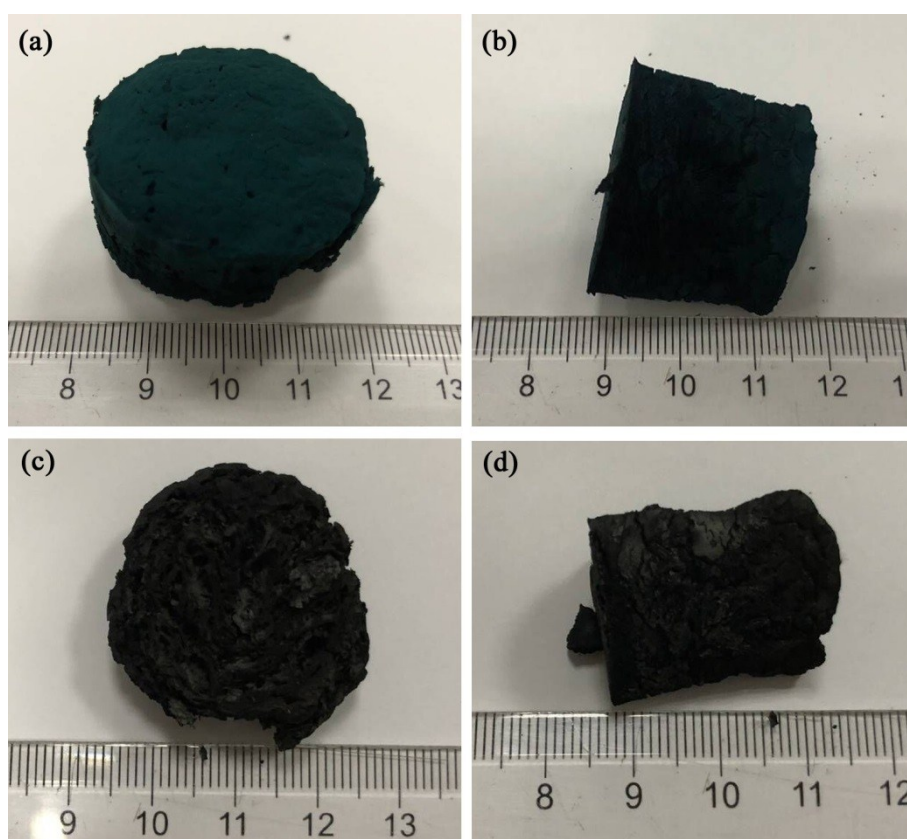

**Figure S2.** Optical images of GO/PANi aerogels (a, b), A-N-GS aerogel (c) and N-GS aerogel (d).

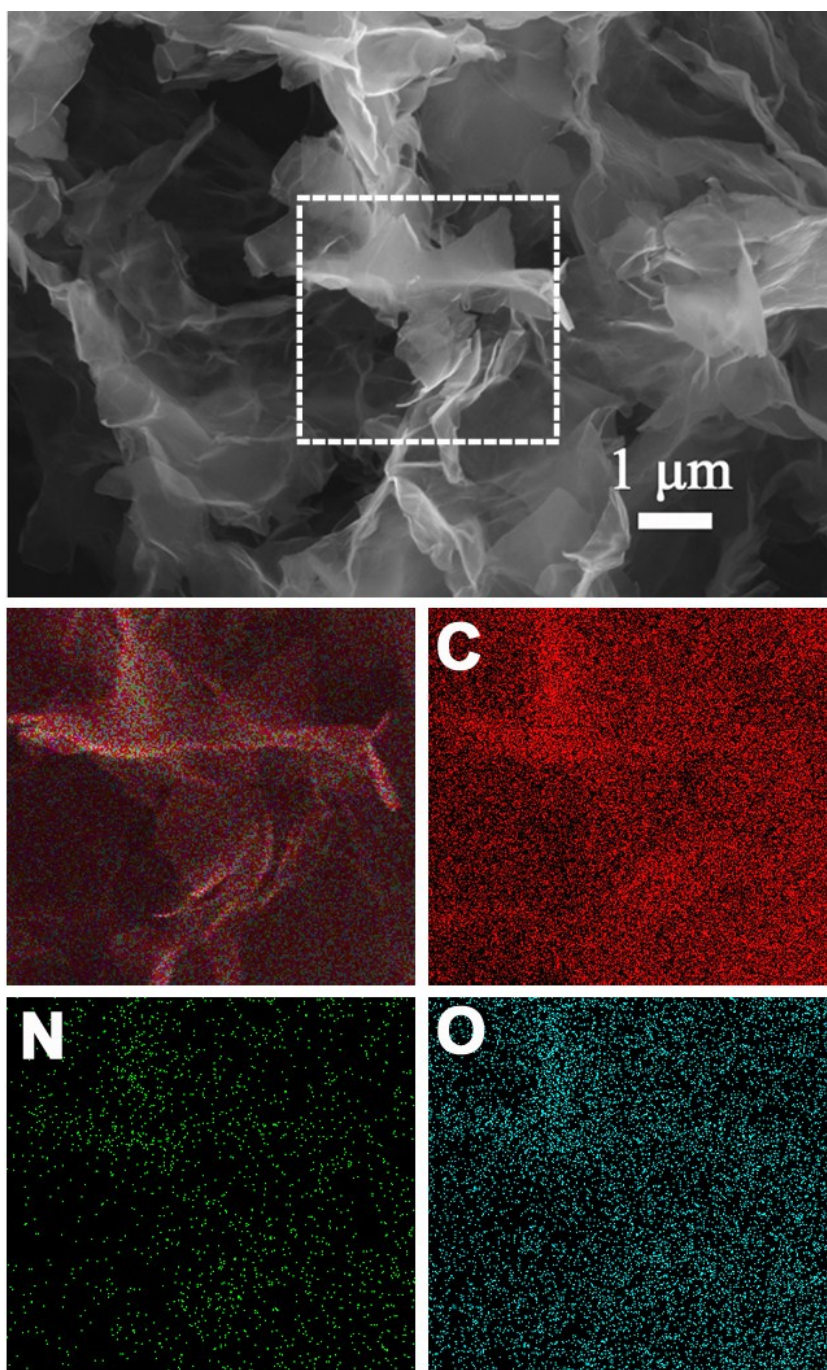

**Figure S3.** SEM images of GO/PANi aerogels and the corresponding EDS mapping.

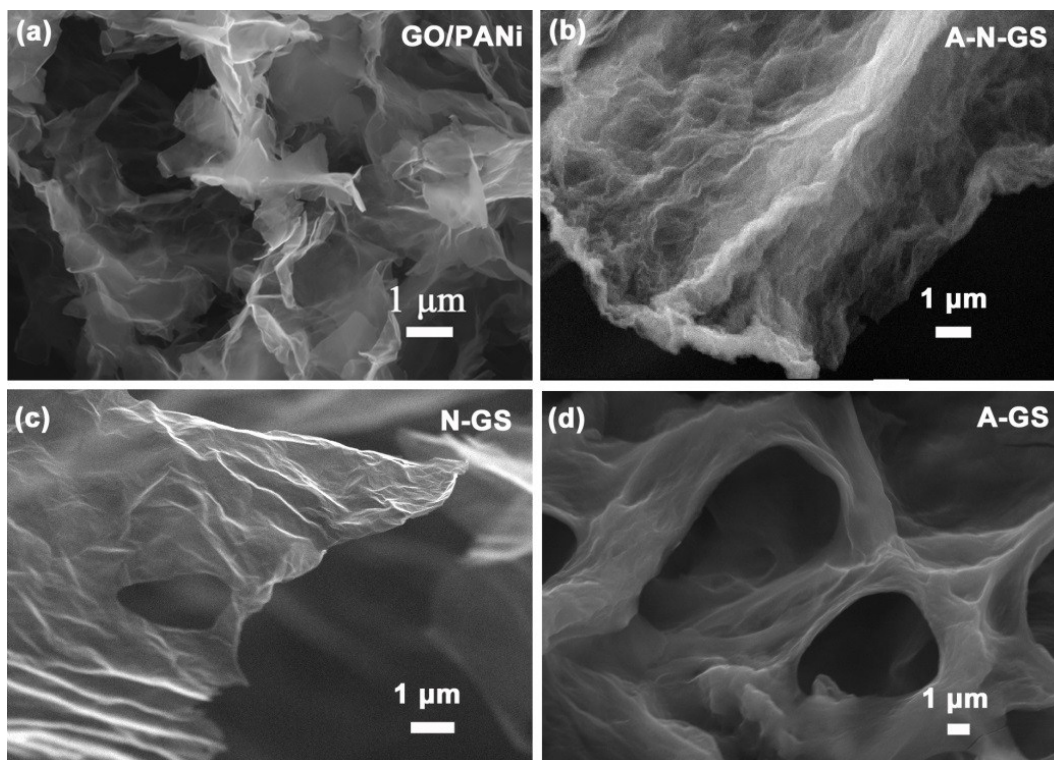

**Figure S4.** SEM images of (a) GO/PANi, (b) A-N-GS, (c) N-GS and (d) A-GS.

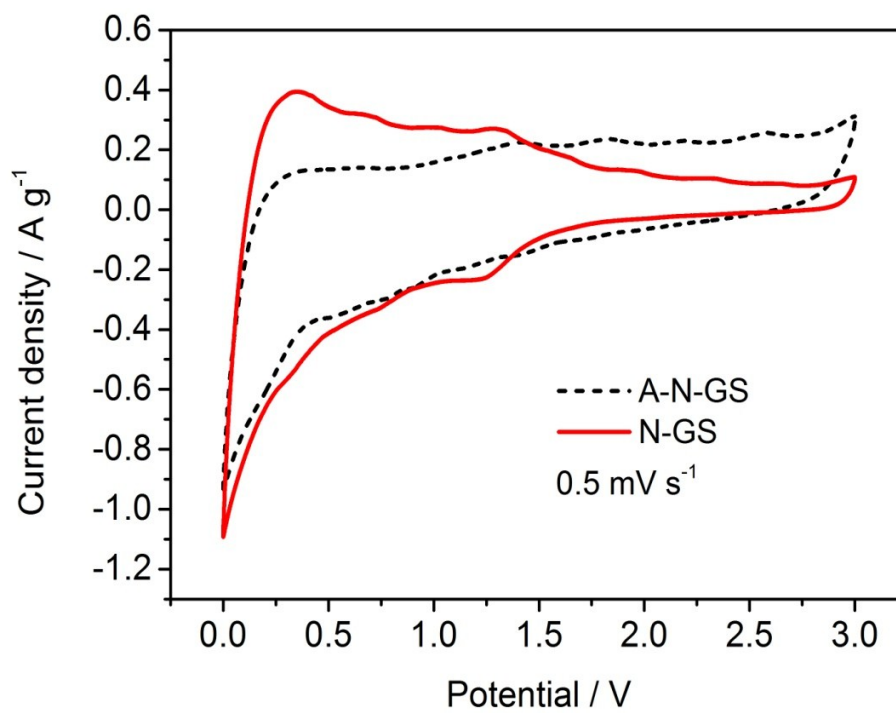

**Figure S5.** CV curves of A-N-GS and N-GS anodes at a scan rate of 0.5 mV/s.

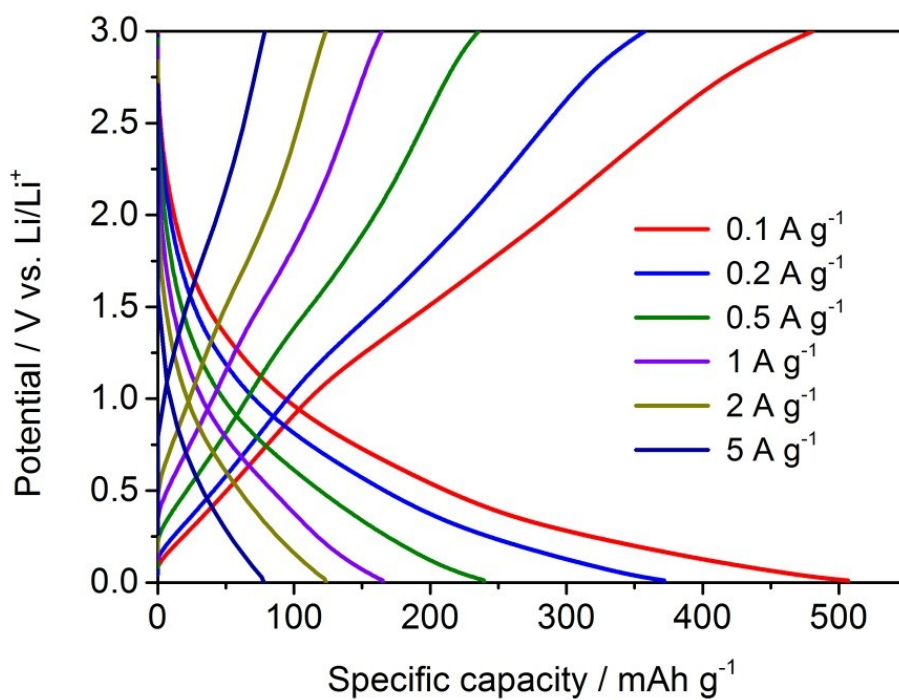

**Figure S6.** Charge-discharge curves of A-N-GS anodes at different current densities.

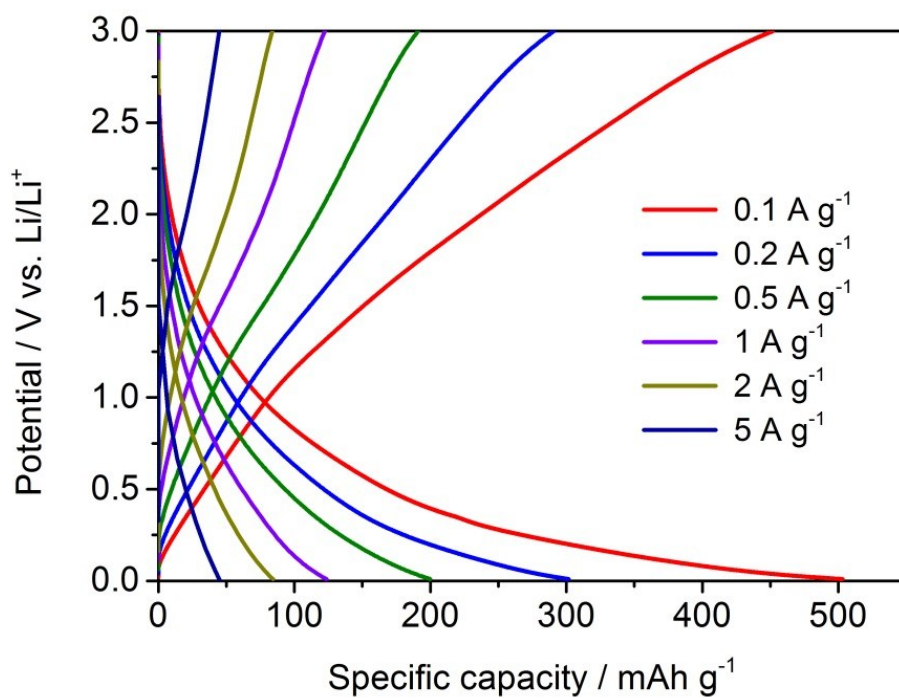

**Figure S7.** Charge-discharge curves of A-GS anodes at different current densities.

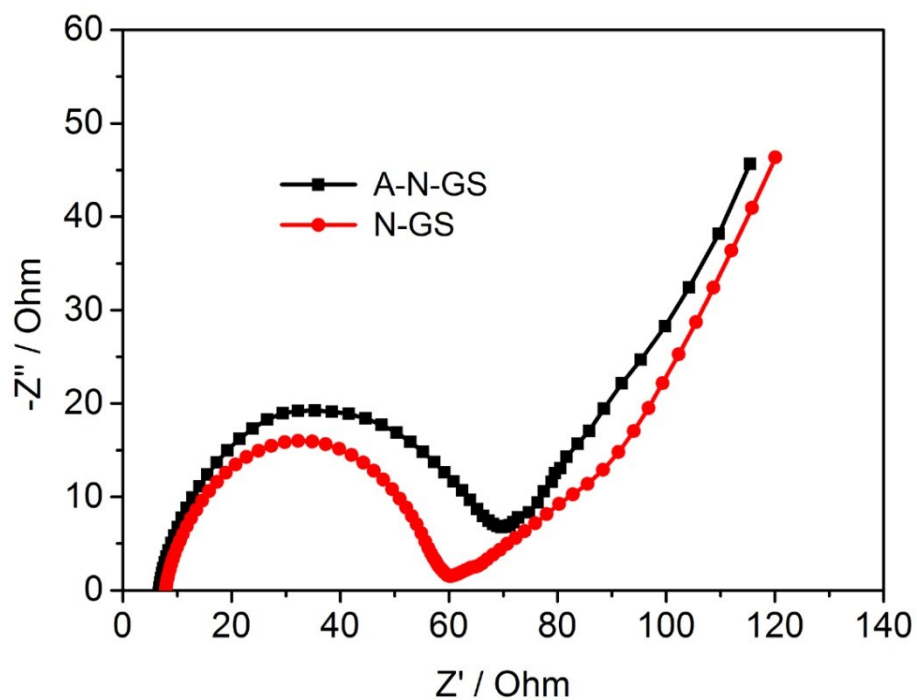

**Figure S8.** Nyquist plots of A-N-GS and N-GS.

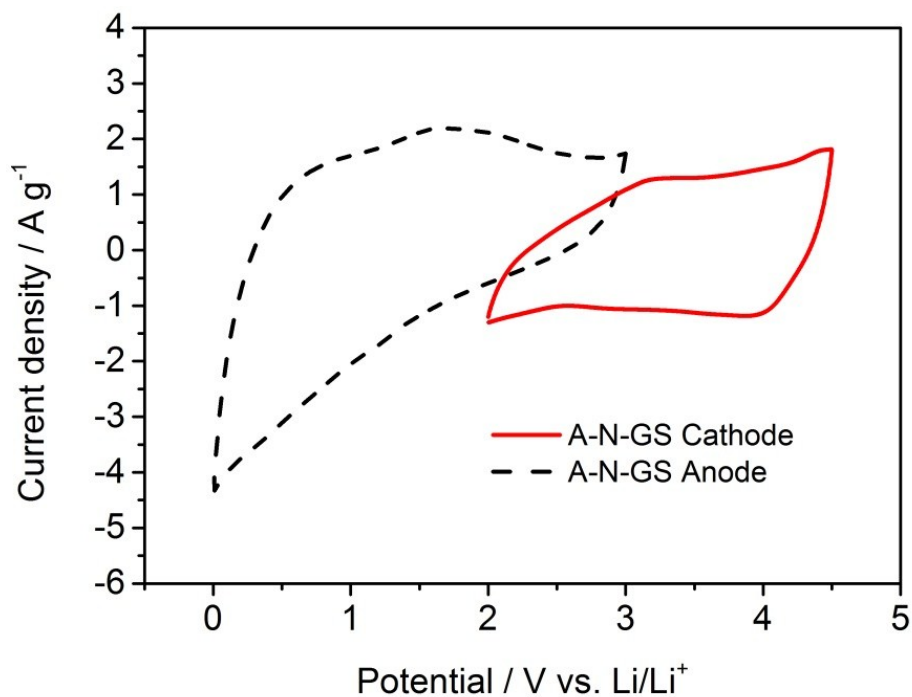

**Figure S9.** CV curves of A-N-GS cathode and A-N-GS anode at a scan rate of 10 mV/s.

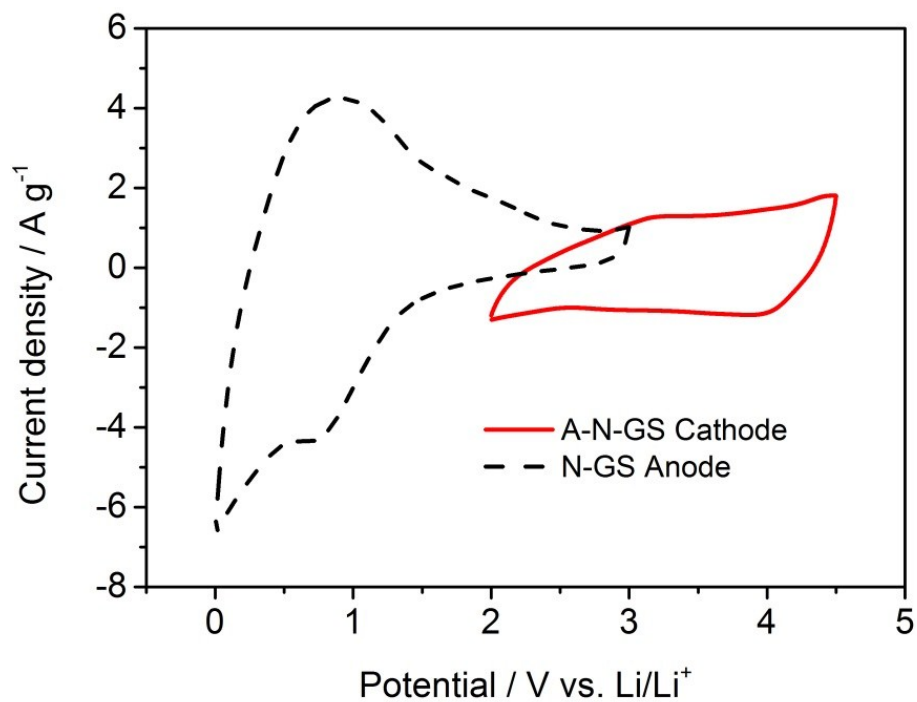

**Figure S10.** CV curves of A-N-GS cathode and N-GS anode at a scan rate of 10 mV/s.

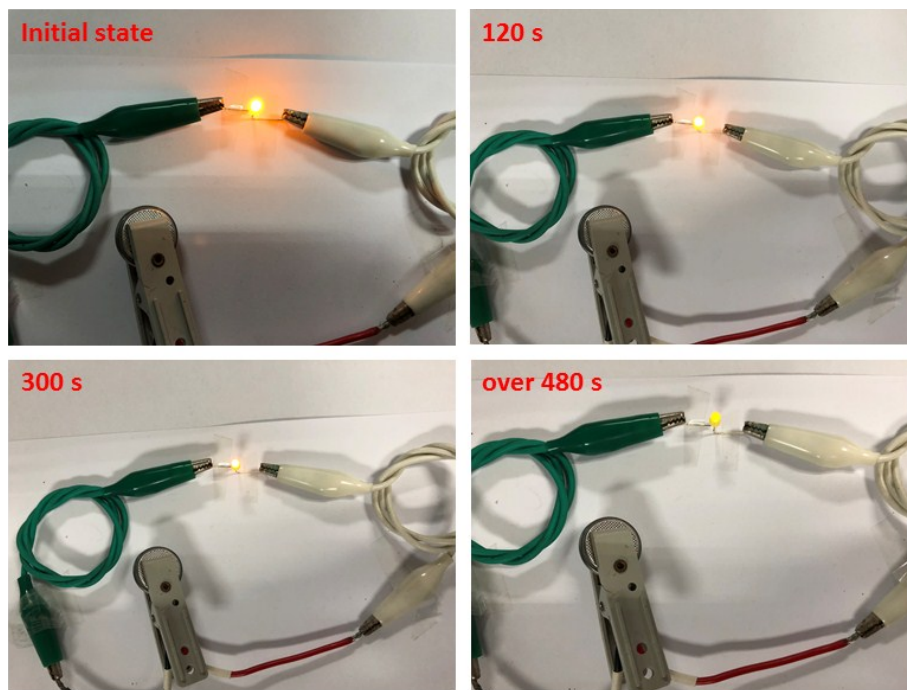

**Figure S11.** Time-dependent optical images of yellow LED powered by a single 4.5 V A-N-GS//N-GS LIC device. Also, a supplementary movie clearly shows that a single LIC could light a LED more than 8 minutes.

**Table S1.** Detailed surface and pore parameters of the graphene samples.

| Sample | $S_{\text{BET}}$ (m <sup>2</sup> /g) | $V_{\text{tot}}$ (cm <sup>3</sup> /g) | $V_{\text{mic}}$ (cm <sup>3</sup> /g) | $V_{\text{mes}}$ (cm <sup>3</sup> /g) | $V_{\text{mac}}$ (cm <sup>3</sup> /g) |
|--------|--------------------------------------|---------------------------------------|---------------------------------------|---------------------------------------|---------------------------------------|
| A-N-G  | 1086.2                               | 0.503                                 | 0.134                                 | 0.36                                  | 0.009                                 |
| A-GS   | 809.2                                | 0.410                                 | 0.125                                 | 0.259                                 | 0.026                                 |
| N-GS   | 201.1                                | 0.506                                 | 0.017                                 | 0.15                                  | 0.338                                 |



**Table S2.** Summary of the electrochemical performance of high voltage (>4.0 V) LICs based on different active materials.

| Reference<br>s | LIC configuration (anode // cathode)                                                   | voltage<br>window | max energy (Wh/kg) @ power<br>(W/kg) | energy (Wh/kg) @ max power<br>(W/kg) | capacity retention         |
|----------------|----------------------------------------------------------------------------------------|-------------------|--------------------------------------|--------------------------------------|----------------------------|
| [1]            | Si/C // porous activated carbon                                                        | 2.0~4.5 V         | 257 @ 867                            | 147 @ 29893                          | 79.2% over 15000<br>cycles |
| [2]            | Si/C // rice husks activated carbon                                                    | 2.0~4.0 V         | 227 @ 1146                           | ~181 @32595                          | N.A.                       |
| [3]            | B-doped Si/SiO <sub>2</sub> /C // activated<br>carbon                                  | 2.0~4.5 V         | 128 @ 1229                           | 89 @ 9704                            | 70% over 6000 cycles       |
| [4]            | Si/C // Biomass-derived porous<br>carbon                                               | 2.0~4.5 V         | 159 @ 945                            | 99 @ 31235                           | 80% over 8000 cycles       |
| [5]            | Li <sub>3</sub> VO <sub>4</sub> /N-doped carbon nanowires //<br>activated carbon       | 1.0~4.0 V         | 136.4 @ 532                          | 24.4 @ 11020                         | ~87% over 1500<br>cycles   |
| [6]            | BiVO <sub>4</sub> // reduced graphene oxide                                            | 0.0~4.0 V         | 152 @ 384                            | 42 @ 3861                            | 81% over 6000 cycles       |
| [7]            | SnO <sub>2</sub> -C // activated carbon (YP47)                                         | 0.0~4.0 V         | 110 @ 173                            | ~48.5@ 2960                          | 80% over 2000 cycles       |
| [8]            | MnFe <sub>2</sub> O <sub>4</sub> /C // 3D amorphous carbon                             | 0.0~4.0 V         | 157 @ 200                            | 58 @ 20000                           | 86.5% over 6000<br>cycles  |
| [9]            | ZnMn <sub>2</sub> O <sub>4</sub> -graphene nanosheets // N-<br>doped carbon nanosheets | 1.0~4.0 V         | 202.8 @ 180                          | 98 @ 21000                           | 86.6% over 6000<br>cycles  |
| [10]           | Fe <sub>3</sub> O <sub>4</sub> // activated carbon nanofiber                           | 1.0~4.0 V         | 124.6 @ 93.8                         | 103.7 @ 4687.5                       | 85.8% over 1000<br>cycles  |

|                  |                                                                                  |                  |                     |                      |                               |
|------------------|----------------------------------------------------------------------------------|------------------|---------------------|----------------------|-------------------------------|
| [11]             | Co <sub>3</sub> ZnC@N-doped porous carbon // heteroatom-doped microporous carbon | 1.0~4.5 V        | 141.4 @ 275         | 15.2 @ 10300         | ~80% over 1000 cycles         |
| [12]             | 3D TiC // porous N-doped carbon                                                  | 0.0~4.5 v        | 101.5 @ 450         | 23.4 @ 67500         | ~82% over 5000 cycles         |
| [13]             | 3D VN-rGO // porous carbon nanorods                                              | 0.0~4.0 V        | 162 @ 200           | 64 @ 10000           | 83% over 1000 cycles          |
| [14]             | B,N-codoped carbon nanofiber (BNC) // BNC                                        | 0.0~4.5 V        | 220 @ 225           | 104 @ 22500          | 81% over 5000 cycles          |
| [15]             | N-doped porous carbon microspheres (NPCM) // activated NPCM                      | 2.0~4.0 V        | 95.08 @ 300         | 48.2 @ 15000         | 80.1% over 5000 cycles        |
| [16]             | Graphene-CNT // graphene-CNT                                                     | 0.01~4.3 V       | ~120 @ ~110         | 29 @ ~20500          | 89% over 10000 cycles         |
| [17]             | Porous carbon nanofiber (PCNF) // PCNF                                           | 1.0~4.0 V        | 106 @ 242           | 53 @ 30000           | 91% over 2000 cycles          |
| <b>This work</b> | <b>N-GS // 3D A-N-GS (binder-free)</b>                                           | <b>0.0~4.5 V</b> | <b>187.9 @ 2250</b> | <b>111.4 @ 11250</b> | <b>93.5% over 3000 cycles</b> |

## References:

- [1] B. Li, F. Dai, Q. F. Xiao, L. Yang, J. M. Shen, C. M. Zhang and M. Cai, Activated Carbon from Biomass Transfer for High-Energy Density Lithium-Ion Supercapacitors. *Advanced Energy Materials*, **2016**, 6, 1600802.
- [2] B. Li, Z. Xiao, M. Chen, Z. Huang, X. Tie, J. Zai and X. Qian, Rice husk-derived hybrid lithium-ion capacitors with ultra-high energy. *Journal of Materials Chemistry A*, **2017**, 5, 24502-24507.
- [3] R. Yi, S. R. Chen, J. X. Song, M. L. Gordin, A. Manivannan and D. H. Wang, High-Performance Hybrid Supercapacitor Enabled by a High-Rate Si-based Anode. *Advanced Functional Materials*, **2014**, 24, 7433-7439.
- [4] Q. Lu, B. Lu, M. Chen, X. Wang, T. Xing, M. Liu and X. Wang, Porous activated carbon derived from Chinese-chive for high energy hybrid lithium-ion capacitor. *Journal of Power Sources*, **2018**, 398, 128-136.
- [5] L. Shen, H. Lv, S. Chen, P. Kopold, P. A. van Aken, X. Wu, J. Maier and Y. Yu, Peapod-like Li<sub>3</sub>VO<sub>4</sub>/N-Doped Carbon Nanowires with Pseudocapacitive Properties as Advanced Materials for High-Energy Lithium-Ion Capacitors. *Advanced Materials*, **2017**, 29, 1700142.
- [6] D. P. Dubal, K. Jayaramulu, R. Zboril, R. A. Fischer and P. Gomez-Romero, Unveiling BiVO<sub>4</sub> nanorods as a novel anode material for high performance lithium ion capacitors: beyond intercalation strategies. *Journal of Materials Chemistry A*, **2018**, 6, 6096-6106.
- [7] W.-H. Qu, F. Han, A.-H. Lu, C. Xing, M. Qiao and W.-C. Li, Combination of a SnO<sub>2</sub>-C hybrid anode and a tubular mesoporous carbon cathode in a high energy density non-aqueous lithium ion capacitor: preparation and characterisation. *Journal of Materials Chemistry A*, **2014**, 2, 6549-6557.
- [8] W. S. V. Lee, E. Peng, M. Li, X. Huang and J. M. Xue, Rational design of stable 4 V lithium ion capacitor. *Nano Energy*, **2016**, 27, 202-212.
- [9] S. Li, J. Chen, M. Cui, G. Cai, J. Wang, P. Cui, X. Gong and P. S. Lee, A High-Performance Lithium-Ion Capacitor Based on 2D Nanosheet Materials. *Small*, **2017**, 13, 1602893.
- [10] R. Shi, C. Han, X. Xu, X. Qin, L. Xu, H. Li, J. Li, C.-P. Wong and B. Li, Electrospun N-Doped Hierarchical Porous Carbon Nanofiber with Improved Degree of Graphitization for High-Performance Lithium Ion Capacitor. *Chemistry – A European Journal*, **2018**, 24, 10460-10467.
- [11] G. Zhu, T. Chen, L. Wang, L. Ma, Y. Hu, R. Chen, Y. Wang, C. Wang, W. Yan, Z. Tie, J. Liu and Z. Jin, High energy density hybrid lithium-ion capacitor enabled by Co<sub>3</sub>ZnC@N-doped carbon nanopolyhedra anode and microporous carbon cathode. *Energy Storage Materials*, **2018**, 14, 246-252.
- [12] H. W. Wang, Y. Zhang, H. X. Ang, Y. Q. Zhang, H. T. Tan, Y. F. Zhang, Y. Y. Guo, J. B. Franklin, X. L. Wu, M. Srinivasan, H. J. Fan and Q. Y. Yan, A High-Energy Lithium-Ion Capacitor by Integration of a 3D Interconnected Titanium Carbide Nanoparticle Chain Anode with a Pyridine-Derived Porous Nitrogen-Doped Carbon Cathode. *Advanced Functional Materials*, **2016**, 26, 3082-3093.
- [13] R. Wang, J. Lang, P. Zhang, Z. Lin and X. Yan, Fast and Large Lithium Storage in 3D Porous VN Nanowires–Graphene Composite as a Superior Anode Toward High-

Performance Hybrid Supercapacitors. *Advanced Functional Materials*, **2015**, 25, 2270-2278.

- [14] Q. Y. Xia, H. Yang, M. Wang, M. Yang, Q. B. Guo, L. M. Wan, H. Xia and Y. Yu, High Energy and High Power Lithium-Ion Capacitors Based on Boron and Nitrogen Dual-Doped 3D Carbon Nanofibers as Both Cathode and Anode. *Advanced Energy Materials*, **2017**, 7, 1701336.
- [15] J. Jiang, P. Nie, B. Ding, Y. Zhang, G. Xu, L. Wu, H. Dou and X. Zhang, Highly stable lithium ion capacitor enabled by hierarchical polyimide derived carbon microspheres combined with 3D current collectors. *Journal of Materials Chemistry A*, **2017**, 5, 23283-23291.
- [16] R. V. Salvatierra, D. Zakhidov, J. Sha, N. D. Kim, S.-K. Lee, A.-R. O. Raji, N. Zhao and J. M. Tour, Graphene Carbon Nanotube Carpets Grown Using Binary Catalysts for High-Performance Lithium-Ion Capacitors. *ACS Nano*, **2017**, 11, 2724-2733.
- [17] T. Le, H. Tian, J. Cheng, Z.-H. Huang, F. Kang and Y. Yang, High performance lithium-ion capacitors based on scalable surface carved multi-hierarchical construction electrospun carbon fibers. *Carbon*, **2018**, 138, 325-336.
